# Supplementary material for: A tool for design of primers for microRNA-specific quantitative RT-qPCR
Source: PubMed Central journal article supplement (PMC3922658; doi:10.1186/1471-2105-15-29), 2014-01-28
Supplement: 1471-2105-15-29-S3.pdf [file 1471-2105-15-29-S3.pdf]

## **Additional file 3 Experimental methods and statistical analysis.**

### **RNA isolation, cDNA synthesis and qPCR**

For the experiment on *ssc*-miR-15a and *ssc*-miR-15b RNA isolation, cDNA synthesis and qPCR were performed as described [18]. Briefly RNA was isolated from porcine lung tissue using miRNeasy Mini Kit (Qiagen, Germany) with DNaseI treatment according to manufacturer's recommendations.

Reverse transcription of 1 µg total RNA was performed according to Balcells *et al.* [9]. Briefly, 100 ng of total RNA were poly(A) tailed and reverse transcribed in a single tube reaction: 1 µl of 10x poly(A) polymerase buffer, 0.1 mM of ATP, 1 µM of RT-primer (5'-CAGGTCCAGTTTTTTTTTTTTTTVN, V = A, C and G; N =A, C, G and T), 0.1 mM of dNTPs, 100 units of MuLV reverse transcriptase (New England Biolabs, USA) and 1 unit of poly(A) polymerase (New England Biolabs, USA) were mixed in a final volume of 10 µl and incubated at 42 °C during 1 hour followed by 5 minutes at 95 °C. The cDNA was diluted before the qPCR reaction.

QPCR analysis were performed on a MX3000P machine (Stratagene, USA) in 10 µl total volume with 1 µl of diluted cDNA, 5 µl of 2x QuantiFast SYBR Green PCR master mix (Qiagen, Germany), 250nM of each miR specific primer. QPCR primers for *ssc*-miR-15a were 5'-gcagtagcagcacataatg and 5'-ggtccagttttttttttttaa described in Skovgaard *et al.* [18] and for *ssc*-miR-15b were: 5'-gcagtagcagcacatca 3' and 5'-ggtccagttttttttttgttaa. Standard curves with 5-fold dilutions (made with a pool of equal amounts of cDNA stocks from all included samples) were made for both assays to calculate the PCR efficiency. Cycling conditions were 95 °C for 5 min followed by 40 cycles of 95 °C for 10 sec and 60 °C 30 sec. A melting curve analysis (60 °C to 99 °C) was performed after the last cycle.

For the experiment on *ssc*-miR-200b, RNA isolation, cDNA synthesis, qPCR and qPCR primers gcagtaatactgctggtaatg and ggtccagttttttttttttcatc are described in [9].

All RT-qPCR experiments are MIQE guidelines compliant.

### **Statistical analysis**

The fraction of functional primers (see for example Table 4) is given with as a number with a margin (for example  $93 \pm 5$  % of the assays worked with the first primer pair selected). The number was calculated as the success rate: number of functional assays divided by the total number of assays. Next, I found the theoretical numbers of functional and failed assays that would give a P-value  $> 0.05$  when compared to the observed numbers of functional and failed assays in a  $\chi^2$ -test. Finally, margins were calculated as: observed success rate – theoretical success rate.

Comparison of primer success rate to the success rate for manually designed primers [9] was done by  $\chi^2$ -test.
