# Supplementary material for: A tool for design of primers for microRNA-specific quantitative RT-qPCR
Source: PubMed Central journal article supplement (PMC3922658; doi:10.1186/1471-2105-15-29), 2014-01-28
Supplement: 1471-2105-15-29-S4.pdf [file 1471-2105-15-29-S4.pdf]

# Additional file 4: Amplification of *ssc-miR-15b* and *ssc-miR-200b* from biological samples.

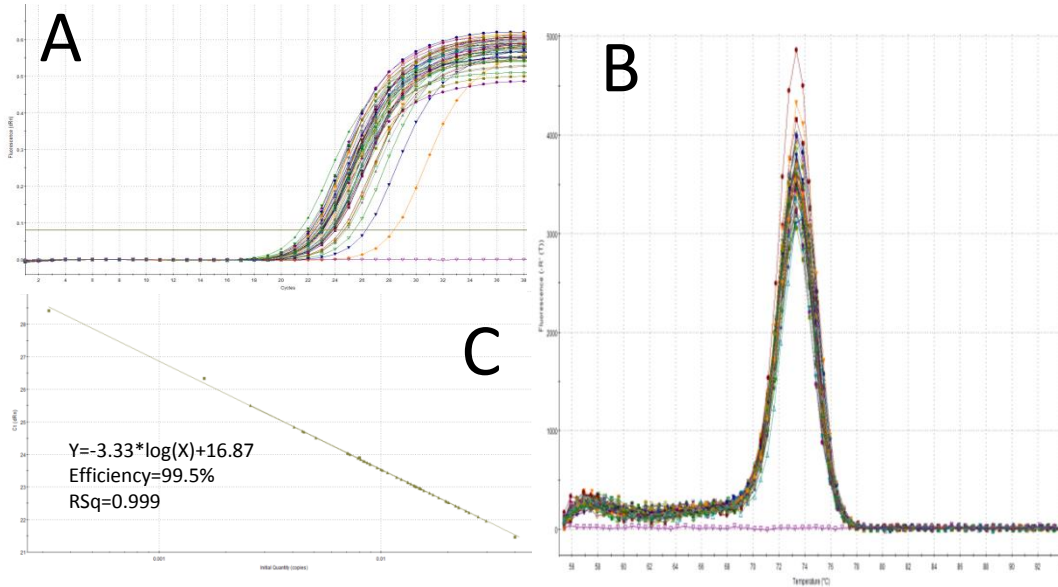

Detection of *ssc-miR-15b* with specific primers in cDNA made from purified pig lung total RNA.

A Amplification curves. B Melting curves. C Extrapolation of Cq as function of the log<sub>10</sub> of the relative number of templates was a straight line ( $R^2 = 0.999$ ) with a slope of -3.33 (PCR efficiency = 99.5 %) over 4 log<sub>10</sub> dilutions of a pool of all the samples used in the experiment. See additional file 3 for experimental methods.

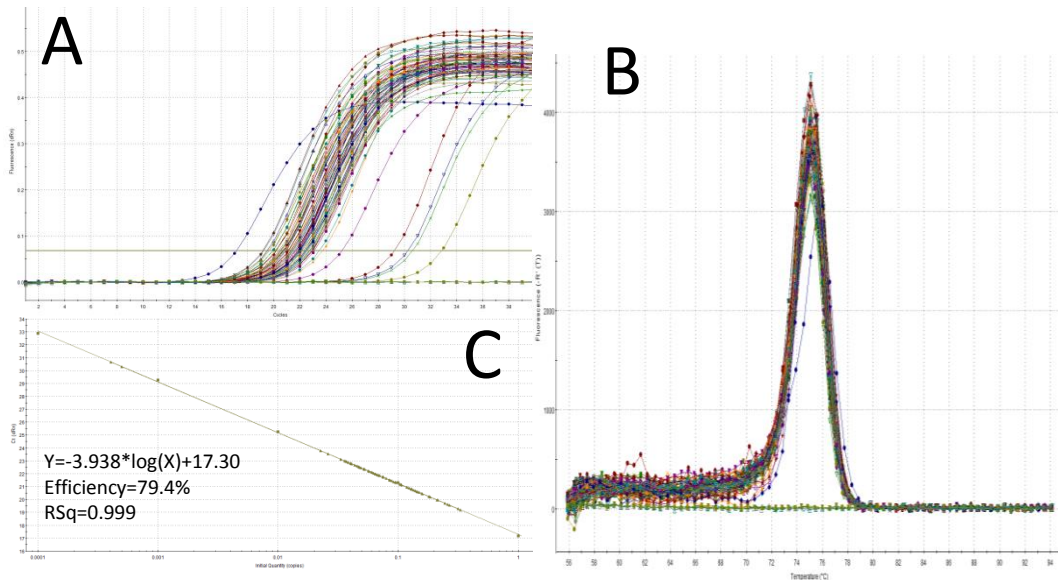

Detection of *ssc-miR-200b* with specific primers in cDNA made from purified pig uterus total RNA.

A Amplification curves. B Melting curves. C Extrapolation of Cq as function of the log<sub>10</sub> of the relative number of templates was a straight line ( $R^2 = 0.999$ ) with a slope of -3.938 (PCR efficiency = 79.4 %) over 4 log<sub>10</sub> dilutions of a pool of all the samples used in the experiment. See additional file 3 for experimental methods.
